# Supplementary material
Source: PubMed Central journal article supplement (PMC3309711)
Supplement: NIHMS203681-supplement-supplement_1.pdf [file NIHMS203681-supplement-supplement_1.pdf]

**SUPPLEMENTAL TABLE:** Summary of Antiretroviral Use  
(% at Baseline, % at Year 5 and % Who Used, Transitioned or Did Not Use in the Interval)

| ARV name      |         | Baseline (%) | Year 5 (%) | Use or Transition (%) |      |
|---------------|---------|--------------|------------|-----------------------|------|
| HAART         | Current | 76.6         | 81.3       | Initiated Use         | 13.9 |
|               | Past    | 11.6         | 13.0       | Continued Use         | 67.5 |
|               | Never   | 11.8         | 5.7        | Discontinued Use      | 10.3 |
|               |         |              |            | Not used*             | 8.2  |
| NRTI          | Current | 84.1         | 85.7       | Initiated Use         | 10.3 |
|               | Past    | 11.1         | 11.7       | Continued Use         | 75.5 |
|               | Never   | 4.8          | 2.5        | Discontinued Use      | 9.0  |
|               |         |              |            | Not used              | 5.2  |
| PI            | Current | 56.4         | 54.7       | Initiated Use         | 13.6 |
|               | Past    | 24.1         | 32.5       | Continued Use         | 41.1 |
|               | Never   | 19.5         | 12.8       | Discontinued Use      | 17.6 |
|               |         |              |            | Not used              | 27.7 |
| NNRTI         | Current | 37.7         | 40.3       | Initiated Use         | 18.7 |
|               | Past    | 19.1         | 35.6       | Continued Use         | 21.6 |
|               | Never   | 43.2         | 24.1       | Discontinued Use      | 20.3 |
|               |         |              |            | Not used              | 39.4 |
| Lamivudine    | Current | 62.5         | 45.9       | Initiated Use         | 10.3 |
|               | Past    | 26.4         | 47.6       | Continued Use         | 35.6 |
|               | Never   | 11.1         | 6.5        | Discontinued Use      | 29.1 |
|               |         |              |            | Not used              | 25.0 |
| Zidovudine    | Current | 32.5         | 24.5       | Initiated Use         | 9.5  |
|               | Past    | 49.1         | 62.3       | Continued Use         | 15.2 |
|               | Never   | 18.5         | 13.2       | Discontinued Use      | 20.4 |
|               |         |              |            | Not used              | 55.0 |
| Stavudine     | Current | 38.0         | 9.4        | Initiated Use         | 1.1  |
|               | Past    | 32.5         | 64.6       | Continued Use         | 8.4  |
|               | Never   | 29.6         | 26.0       | Discontinued Use      | 32.7 |
|               |         |              |            | Not used              | 57.9 |
| Tenofovir     | Current | 1.1          | 49.7       | Initiated Use         | 48.6 |
|               | Past    | 0.2          | 7.6        | Continued Use         | 1.1  |
|               | Never   | 98.7         | 42.8       | Discontinued Use      | 7.3  |
|               |         |              |            | Not used              | 43.0 |
| Didanosine    | Current | 15.1         | 12.0       | Initiated Use         | 6.7  |
|               | Past    | 30.6         | 43.0       | Continued Use         | 5.2  |
|               | Never   | 54.3         | 45.1       | Discontinued Use      | 15.3 |
|               |         |              |            | Not used              | 72.8 |
| Abacavir      | Current | 19.5         | 21.4       | Initiated Use         | 10.9 |
|               | Past    | 11.5         | 26.8       | Continued Use         | 10.5 |
|               | Never   | 69.0         | 51.8       | Discontinued Use      | 17.2 |
|               |         |              |            | Not used              | 61.4 |
| Emtricitabine | Current | 0.0          | 24.1       | Initiated Use         | 24.1 |
|               | Past    | 0.0          | 3.4        | Continued Use         | 0.0  |
|               | Never   | 100.0        | 72.5       | Discontinued Use      | 3.4  |
|               |         |              |            | Not used              | 72.5 |

\* means not used between FRAM1 and FRAM2

**SUPPLEMENTAL TABLE, continued:** Summary of Antiretroviral Use  
(% at Baseline, % at Year 5 and % Who Used, Transitioned or Did Not Use in the Interval)

| ARV name      |         | Baseline (%) | Year 5 (%) | Use or Transition (%) |      |
|---------------|---------|--------------|------------|-----------------------|------|
| Zalcitabine   | Current | 0.4          | 0.2        | Initiated Use         | 0.2  |
|               | Past    | 15.5         | 15.9       | Continued Use         | 0.0  |
|               | Never   | 84.1         | 83.9       | Discontinued Use      | 0.8  |
|               |         |              |            | Not used              | 99.0 |
| Ritonavir     | Current | 27.9         | 42.6       | Initiated Use         | 21.6 |
|               | Past    | 14.1         | 19.5       | Continued Use         | 21.0 |
|               | Never   | 58.1         | 38.0       | Discontinued Use      | 12.2 |
|               |         |              |            | Not used              | 45.3 |
| Indinavir     | Current | 17.4         | 5.2        | Initiated Use         | 1.5  |
|               | Past    | 31.2         | 46.1       | Continued Use         | 3.8  |
|               | Never   | 51.4         | 48.6       | Discontinued Use      | 16.1 |
|               |         |              |            | Not used              | 78.6 |
| Nelfinavir    | Current | 16.8         | 6.1        | Initiated Use         | 0.6  |
|               | Past    | 27.7         | 40.7       | Continued Use         | 5.5  |
|               | Never   | 55.6         | 53.3       | Discontinued Use      | 13.0 |
|               |         |              |            | Not used              | 80.9 |
| Lopinavir     | Current | 10.3         | 18.7       | Initiated Use         | 13.0 |
|               | Past    | 1.3          | 16.8       | Continued Use         | 5.7  |
|               | Never   | 88.5         | 64.6       | Discontinued Use      | 15.7 |
|               |         |              |            | Not used              | 65.6 |
| Saquinavir    | Current | 8.4          | 5.9        | Initiated Use         | 3.2  |
|               | Past    | 21.4         | 28.1       | Continued Use         | 2.7  |
|               | Never   | 70.2         | 66.0       | Discontinued Use      | 7.6  |
|               |         |              |            | Not used              | 86.6 |
| Atazanavir    | Current | 0.0          | 18.9       | Initiated Use         | 18.9 |
|               | Past    | 0.0          | 5.7        | Continued Use         | 0.0  |
|               | Never   | 100.0        | 75.5       | Discontinued Use      | 5.7  |
|               |         |              |            | Not used              | 75.5 |
| Amprenavir    | Current | 7.1          | 0.8        | Initiated Use         | 0.0  |
|               | Past    | 2.3          | 11.7       | Continued Use         | 0.8  |
|               | Never   | 90.6         | 87.4       | Discontinued Use      | 9.4  |
|               |         |              |            | Not used              | 89.7 |
| Fosamprenavir | Current | 0.0          | 6.1        | Initiated Use         | 6.1  |
|               | Past    | 0.0          | 2.3        | Continued Use         | 0.0  |
|               | Never   | 100.0        | 91.6       | Discontinued Use      | 2.3  |
|               |         |              |            | Not used              | 91.6 |
| Tipranavir    | Current | 0.0          | 0.4        | Initiated Use         | 0.4  |
|               | Past    | 0.0          | 0.2        | Continued Use         | 0.0  |
|               | Never   | 100.0        | 99.4       | Discontinued Use      | 0.2  |
|               |         |              |            | Not used              | 99.4 |
| Efavirenz     | Current | 24.7         | 28.3       | Initiated Use         | 14.5 |
|               | Past    | 13.2         | 28.3       | Continued Use         | 13.8 |
|               | Never   | 62.1         | 43.4       | Discontinued Use      | 16.6 |
|               |         |              |            | Not used              | 55.1 |

\* means not used between FRAM1 and FRAM2

**SUPPLEMENTAL TABLE, continued:** Summary of Antiretroviral Use  
 (% at Baseline, % at Year 5 and % Who Used, Transitioned or Did Not Use in the Interval)

| <b>ARV name</b>         |                | <b>Baseline (%)</b> | <b>Year 5 (%)</b> | <b>Use or Transition (%)</b> |      |
|-------------------------|----------------|---------------------|-------------------|------------------------------|------|
| <b>Nevirapine</b>       | <b>Current</b> | 12.2                | 11.5              | <b>Initiated Use</b>         | 5.7  |
|                         | <b>Past</b>    | 13.2                | 21.2              | <b>Continued Use</b>         | 5.9  |
|                         | <b>Never</b>   | 74.6                | 67.3              | <b>Discontinued Use</b>      | 9.2  |
|                         |                |                     |                   | <b>Not used</b>              | 79.3 |
| <b>Delavirdine</b>      | <b>Current</b> | 1.1                 | 0.4               | <b>Initiated Use</b>         | 0.0  |
|                         | <b>Past</b>    | 3.8                 | 5.2               | <b>Continued Use</b>         | 0.4  |
|                         | <b>Never</b>   | 95.2                | 94.3              | <b>Discontinued Use</b>      | 1.5  |
|                         |                |                     |                   | <b>Not used</b>              | 98.1 |
| <b>Entry Inhibitors</b> | <b>Current</b> | 0.4                 | 2.5               | <b>Initiated Use</b>         | 2.3  |
|                         | <b>Past</b>    | 0.2                 | 1.7               | <b>Continued Use</b>         | 0.2  |
|                         | <b>Never</b>   | 99.4                | 95.8              | <b>Discontinued Use</b>      | 1.5  |
|                         |                |                     |                   | <b>Not used</b>              | 96.0 |

\* means not used between FRAM1 and FRAM2
